# Supplementary material
Source: PubMed Central journal article supplement (PMC5356025)
Supplement: NIHMS850431-supplement-Supplemental_Figure.pdf [file NIHMS850431-supplement-Supplemental_Figure.pdf]

## SUPPLEMENTARY MATERIAL

### cAMP-Response Element-Binding 3-Like Protein 1 (CREB3L1) is Required for Decidualization and its Expression is Decreased in Women with Endometriosis

J.I. Ahn<sup>1,2</sup>, J.-Y. Yoo<sup>3,§</sup>, T.H. Kim<sup>3</sup>, Y.I. Kim<sup>1,2</sup>, S.D. Ferguson<sup>3</sup>, A. Fazleabas<sup>3,4</sup>, S.L. Young<sup>5</sup>, B.A. Lessey<sup>6</sup>, J.Y. Ahn<sup>2</sup>, J.M. Lim<sup>1,2</sup> and J.-W. Jeong<sup>3,4</sup>

<sup>1</sup>Laboratory of Stem Cell and Bioevaluation, Major in Biomodulation, Seoul National University, Seoul 151-921, Republic of Korea; <sup>2</sup>Department of Agricultural Biotechnology, Seoul National University, Seoul 151-921, Republic of Korea; <sup>3</sup>Department of Obstetrics and Gynecology & Reproductive Biology, Michigan State University, College of Human Medicine, Grand Rapid, MI 49503, USA; <sup>4</sup>Department of Women's Health, Spectrum Health System, Grand Rapids, MI 49341, USA; <sup>5</sup>Department of Obstetrics and Gynecology, University of North Carolina, Chapel Hill, NC 27599, USA; <sup>6</sup>Department of Obstetrics and Gynecology, University Medical Group, Greenville Hospital System, Greenville, SC 29605, USA

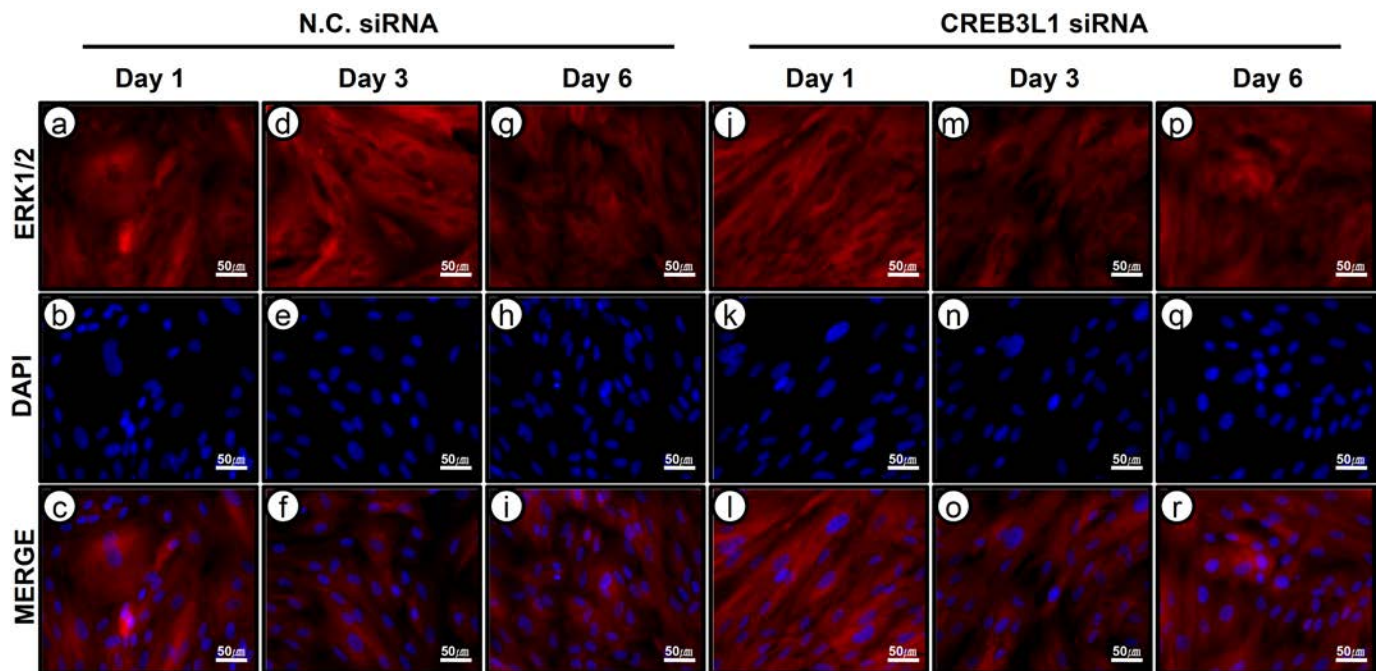

**Supplemental Fig. (1).** The expression of ERK1/2 by CREB3L1 during hESCs decidualization. Expression levels of total ERK1/2 were not changed during *in vitro* decidualization of hESCs with CREB3L1 siRNA compared to transfected with non-targeting pool siRNA. Nuclei were counterstained with DAPI staining.
